# Supplementary material for: Identification and Characterization of a Novel Hypovirus from the Phytopathogenic Fungus Botryosphaeria dothidea
Source: MDPI journal article supplement (doi:10.3390/v15102059), 2023-10-07
Supplement: s1 [file s1]

**Supplementary Table S2.** Abbreviations of virus names and viral polyprotein accession numbers used in alignment analysis in this study.

| <b>Virus</b>                           | <b>Abbreviation</b> | <b>accession number</b> |
|----------------------------------------|---------------------|-------------------------|
| <b><i>Alphahypovirus</i></b>           |                     |                         |
| Cryphonectria hypovirus 1              | CHV1                | AAA67458                |
| Cryphonectria hypovirus 2              | CHV2                | AAA20137                |
| <b><i>Betahypovirus</i></b>            |                     |                         |
| Cryphonectria hypovirus 3              | CHV3                | AAF13604                |
| Cryphonectria hypovirus 4              | CHV4                | AAQ76546                |
| Sclerotinia sclerotiorum hypovirus 1   | SsHV1               | AE699352                |
| Setosphaeria turcica hypovirus 1       | StHV1               | AZT88613                |
| Trichoderma harzianum hypovirus 1      | ThHV1               | QGA30969                |
| Fusarium oxysporum dianthi hypovirus 2 | FodHV2              | QHI00074                |
| Valsa ceratosperma hypovirus 1         | VcHV1               | BAM08994                |
| Phomopsis longicolla hypovirus         | PlHV1               | AIG94930                |
| Botrytis cinerea hypovirus 1           | BcHV1               | WAT23236                |
| <b><i>Gammahypovirus</i></b>           |                     |                         |
| Sclerotium rolfsii hypovirus 2         | SrHV2               | AZF86107                |
| Sclerotium rolfsii hypovirus 3         | SrHV3               | AZF86108                |
| <b><i>Deltahypovirus</i></b>           |                     |                         |
| Beihai sipunculid worm virus 6         | BHSWV6              | APG76084                |
| Beihai hypo-like virus 1               | BH-LV1              | APG76085                |
| <b><i>Epsilonhypovirus</i></b>         |                     |                         |
| Agaricus bisporus virus 2              | AbV2                | AQM49947                |
| Fusarium poae hypovirus 1              | FpHV1               | BAV56305                |
| <b><i>Zetahypovirus</i></b>            |                     |                         |
| Sclerotinia sclerotiorum hypovirus 6   | SrHV6               | AZF86111                |
| <b><i>Etahypovirus</i></b>             |                     |                         |
| Sclerotium rolfsii hypovirus 8         | SrHV8               | AZF86113                |
| <b><i>Thetahypovirus</i></b>           |                     |                         |
| Sclerotium rolfsii hypovirus 1         | SrHV1               | AZA15168                |
| Sclerotinia sclerotiorum hypovirus 2   | SsHV2               | QBA69886                |
