# Supplementary material for: Identification and Characterization of a Novel Hypovirus from the Phytopathogenic Fungus Botryosphaeria dothidea
Source: MDPI journal article supplement (doi:10.3390/v15102059), 2023-10-07
Supplement: s1 [file s1]

**Supplementary Table S3.** Amino acid identity between BdHV1/SXD111 and representative members of the genus *Hypovirus* in the polyprotein.

| <b>Virus name</b>                       | <b>Length (aa)</b> | <b>Coverage (%)</b> | <b>E value</b> | <b>Identity (%)</b> | <b>Accession number</b> |
|-----------------------------------------|--------------------|---------------------|----------------|---------------------|-------------------------|
| Cryphonectria hypovirus 4               | 2848               | 77                  | 0              | 49.77               | YP_138519               |
| Alternaria dianthicola hypovirus 1      | 2745               | 74                  | 0              | 49.70               | UYZ32447                |
| Erysiphe necator associated hypovirus 1 | 3522               | 75                  | 0              | 48.05               | QHD64829                |
| Phomopsis longicolla hypovirus          | 2848               | 77                  | 0              | 48.12               | YP_009051683            |
| Trichoderma harzianum hypovirus 1       | 2807               | 74                  | 0              | 49.39               | QGA30970                |
| Cryphonectria hypovirus 3               | 2874               | 77                  | 0              | 47.65               | AAF13603                |
| Valsa ceratosperma hypovirus 1          | 2940               | 74                  | 0              | 48.11               | YP_005476604            |
| Monilinia fructicola hypovirus 1        | 2918               | 78                  | 0              | 46.46               | UTQ48841                |
| Sclerotinia sclerotiorum hypovirus 7    | 2973               | 74                  | 0              | 48.22               | QUE49155                |
| Botrytis cinerea hypovirus 1            | 2965               | 74                  | 0              | 48.14               | UNI72644                |
| Fusarium concentricum hypovirus 1       | 2950               | 77                  | 0              | 46.73               | BCP96877                |
| Botrytis cinerea hypovirus 3            | 3042               | 77                  | 0              | 45.93               | QJT73707                |
| Botrytis cinerea hypovirus 5a           | 2972               | 78                  | 0              | 45.88               | WGO62045                |
| Sclerotinia sclerotiorum hypovirus 1    | 2948               | 78                  | 0              | 45.29               | YP_004782527            |
| Fusarium oxysporum dianthi hypovirus 2  | 2892               | 74                  | 0              | 46.61               | YP_010800030            |
| Setosphaeria turcica hypovirus 1        | 2751               | 71                  | 0              | 49.79               | YP_010799558            |
