# Supplementary material for: Identification and Characterization of a Novel Hypovirus from the Phytopathogenic Fungus Botryosphaeria dothidea
Source: MDPI journal article supplement (doi:10.3390/v15102059), 2023-10-07
Supplement: s1 [file s1]

**Supplementary Table S1.** Primers used in this study.

| Primer Name    | Oligonucleotide sequence (5'- 3') | Usage                       |
|----------------|-----------------------------------|-----------------------------|
| BdHV1deF2      | TCACACGGTCGTGACAGAAG              | For detecting BdHV1         |
| BdHV1deR2      | GACAGTCCAGCGTGGTTACA              |                             |
| BdCV1-CPdeF    | GGGAACCAGAGCACGATTCA              | For detecting BdCV1         |
| BdCV1-CPdeF    | ACGGTGAAGTTGTCGATCC               |                             |
| BdPV1-RdRpdeF  | CCCTCCGGATCTGGTTTCAC              | For detecting BdPV1         |
| BdPV1-RdRpdeF  | GGGATTTCGTCCAGTCCGAG              |                             |
| BdVV3-RdRpdeF  | CAGCAGCCAACAAGGTCAAC              | For detecting BdVV3         |
| BdVV3-RdRpdeF  | GCCGGTATTCACGATCGACT              |                             |
| BdPmV1-RdRpdeF | ACGATTTCATCAGCCACTAC              | For detecting BdPmV1        |
| BdPmV1-RdRpdeR | CGGCGAGACGTTGAATATGA              |                             |
| BdHV1-F1       | GGTGCAACTTCACAGCCTTG              | For cloning of BdHV1/SXD111 |
| BdHV1-R1       | TGACAGTCCAGCGTGGTTAC              |                             |
| BdHV1-F2       | CCTTTTCGGCTGTTGGTGTG              |                             |
| BdHV1-R2       | ACCAGTCAGCTTCTGTCACG              |                             |
| BdHV1-F3       | CGAACGACCCCTTGTGAAGA              |                             |
| BdHV1-R3       | CCAGCTATTTACGCGCTTC               |                             |
| BdHV1-F4       | TTTTCTGTCGCCCCGCAT                |                             |
| BdHV1-R4       | TGCGCAACTCGAACCTGT                |                             |
| BdHV1-F5       | TGTTTCACTGTCTCGACCCG              |                             |
| BdHV1-R5       | TCTTCACAAGGGGTCGTTTCG             |                             |
| BdHV1-F6       | ATGCGCCCTTTCAAACGC                |                             |
| BdHV1-R6       | AGCGTGCGCCAAGTAGAA                |                             |

|                  |                                                    |                                          |
|------------------|----------------------------------------------------|------------------------------------------|
| BdHV1-F7         | TTGCAGCGCTCCATGACA                                 |                                          |
| BdHV1-R7         | ACGGCCGTTGTCAAACCA                                 |                                          |
| BdHV1-F8         | AGCGGCATGGAATCTCGG                                 |                                          |
| BdHV1-R8         | TGCTGGGGCGCTTGATAC                                 |                                          |
| BdHV1-3RACE1     | CGTCGAGCTCGATGTTTCAG                               |                                          |
| BdHV1-3RACE2     | GGGCAAAGCTGTTACTTG                                 |                                          |
| BdHV1-5RACE1     | GCCACTTGTGAGAGGTACG                                | For terminal cloning of BdHV1/SXD111     |
| BdHV1-5RACE2     | GGAAGAATTGGGCTTAACG                                |                                          |
| RACE-OLIGO       | GCATTGCATCATGATCGATCGAATTCTTTAGTGAGGGTTAA<br>TTGCC | For RLM-RACE of BdPmV1 and BdPV1         |
| RACE-1st         | GGCAATTAACCCTCACTAAAG                              |                                          |
| RACE-2nd         | TACTAAAGAATTCGATCGATC                              | For terminal cloning of BdPmV1 and BdPV1 |
| RACE-3rd         | CGATCGATCATGATGCAATGC                              |                                          |
| BdPmV1RNA1F      | TCCGCCCCACTACTCAACAAC                              |                                          |
| BdPmV1RNA1R      | GTCCACGTCAACCATCGAGT                               | For cloning of BdPmV1-dsRNA1             |
| BdPmV1RNA1-3RACE | GGCTATTGACAAGCTCTAC                                |                                          |
| BdPmV1RNA1-5RACE | CGGCGAGACGTTGAATATG                                | For terminal cloning of BdPmV1-dsRNA1    |
| BdPmV1RNA2F      | GGAGTCAGCCATGCTCTTGT                               |                                          |
| BdPmV1RNA2R      | TGTGAGTGATGACGTCTGCC                               | For cloning of BdPmV1-dsRNA2             |
| BdPmV1RNA2-3RACE | CGTCAGTGTGGATGATTACC                               |                                          |
| BdPmV1RNA2-5RACE | GTGGACACTACCTCAAGTATTCG                            | For terminal cloning of BdPmV1-dsRNA2    |
| BdPmV1RNA3F      | CCGTTCAACA TCTTCGAGTTC                             |                                          |
| BdPmV1RNA3R      | GGAGTTGATCATGAACCCAG                               | For cloning of BdPmV1-dsRNA3             |
| BdPmV1RNA3-3RACE | CCATGCACTTCGTGCCAG                                 |                                          |
| BdPmV1RNA3-5RACE | GCGTGGGAGTATTTGGAG                                 | For terminal cloning of BdPmV1-dsRNA3    |

|                  |                             |                                           |
|------------------|-----------------------------|-------------------------------------------|
| BdPmV1RNA4-3RACE | CCATAGGTCCCGGGGTTGGAG       | For terminal cloning of BdPmV1-dsRNA4     |
| BdPmV1RNA4-5RACE | TCATCAAGTTGGCGTCCCTC        |                                           |
| BdPmV1RNA5-3RACE | GTCTTGGCGAGCTGGTAGTAG       | For terminal cloning of BdPmV1-dsRNA5     |
| BdPmV1RNA5-5RACE | GGAGGACATTGAGTTCGAGATC      |                                           |
| BdPV1RNA1-3RACE  | GGGATTTTCGTCCAGTCCGAG       | For terminal cloning of BdPV1-dsRNA1      |
| BdPV1RNA1-5RACE  | CCCTCCGGATCTGGTTTCAC        |                                           |
| BdPV1RNA2-3RACE  | CCGTCAAACCAAGCCTCC          | For terminal cloning of BdPV1-dsRNA2      |
| BdPV1RNA2-5RACE  | CGAAGCGATCGACGAGATG         |                                           |
| BdPV1RNA3-3RACE  | GGCTAGTCGAACGTAGGAGC        | For terminal cloning of BdPV1-dsRNA3      |
| BdPV1RNA3-5RACE  | CTTCCGCAGTCGGGTAAGAG        |                                           |
| RdPdN6           | CGATCGATCATGATGCAATGCNNNNNN | For random cloning of BdPV1/SXD111-dsRNA3 |
| RdSP             | CGATCGATCATGATGCAATGC       |                                           |
